# Supplementary material for: Characteristics of Resting-State Functional Connectivity in Intractable Unilateral Temporal Lobe Epilepsy Patients with Impaired Executive Control Function
Source: PubMed Central journal article supplement (PMC5770650; doi:10.3389/fnhum.2017.00609), 2017-12-13
Supplement: Image_1.pdf [file Image_1.pdf]

## Supplementary Figures

# Impaired Executive Control Function in Intractable Unilateral Temporal Lobe Epilepsy: Revealed by Extrinsic Brain Network Connectivity

Chao Zhang,<sup>1,2+</sup> Hongyu Yang,<sup>1,2+</sup> Wen Qin,<sup>3</sup> Chang Liu,<sup>4</sup> Zhigang Qi,<sup>1,2</sup>

\*Correspondence: Nan Chen

E-mail address: [chenzen8057@sina.com](mailto:chenzen8057@sina.com)

\*Correspondence may also be: Kuncheng Li

E-mail address: [cjr.likuncheng@vip.163.com](mailto:cjr.likuncheng@vip.163.com)

+ contributed equally to this work

### 1 Supplementary Figures

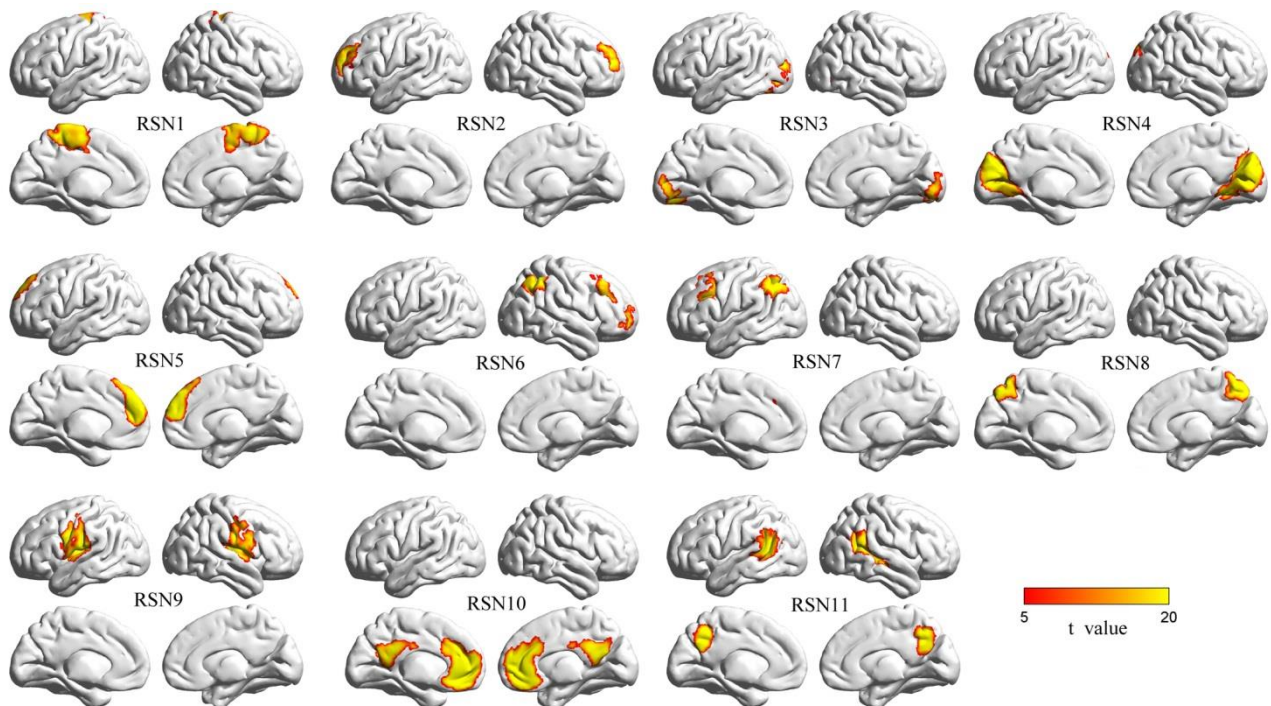

**Supplementary Figure 1.** Three-dimensional images made by BrainNet Viewer. Eleven RSNs identified by GIG-ICA across all subjects. Functional maps were showed on the lateral and medial surfaces of bilateral hemisphere. The color scale represents the t values in each RSN. RSN1, dorsal

sensorimotor network (dSMN); RSN2, executive control network (ECN); RSN3, occipital pole visual network (pVN); RSN4, medial visual network (mVN); RSN5, anterior default-mode related network (aDMN); RSN6, left frontoparietal network (lFPN); RSN7, right frontoparietal network (rFPN); RSN8, visuospatial network (VSN); RSN9, ventral sensorimotor related network (vSMN); RSN10, default-mode network (DMN); RSN11, posterior default-mode network (pDMN).

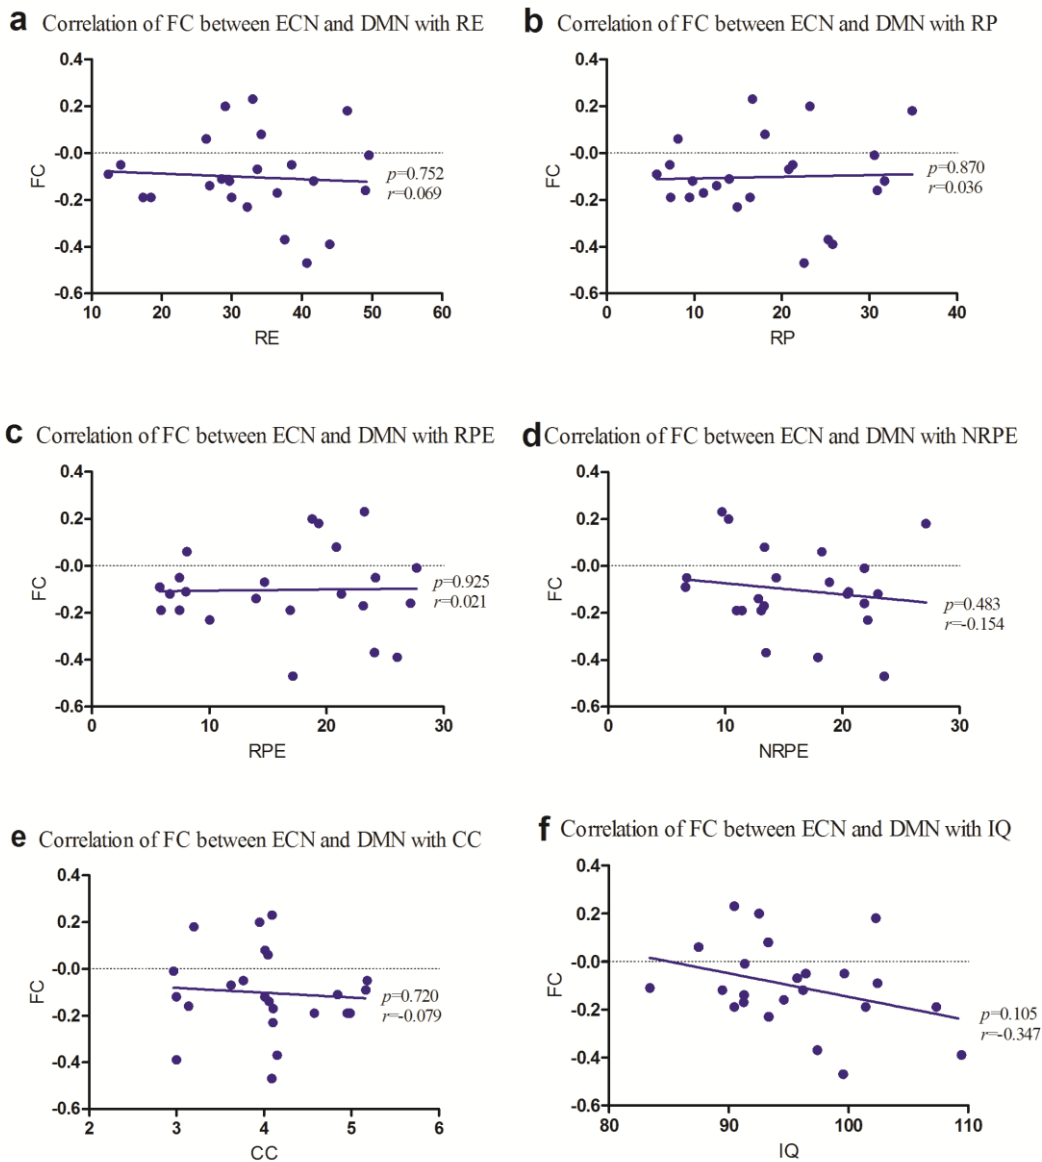

**Supplementary Figure 2.** Correlations of FC between ECN and DMN with WCST and IQ scores in healthy controls. No significant correlation was found between FC with WCST and IQ scores ( $p>0.05$ ).

### WCST score differences between G1 and G2

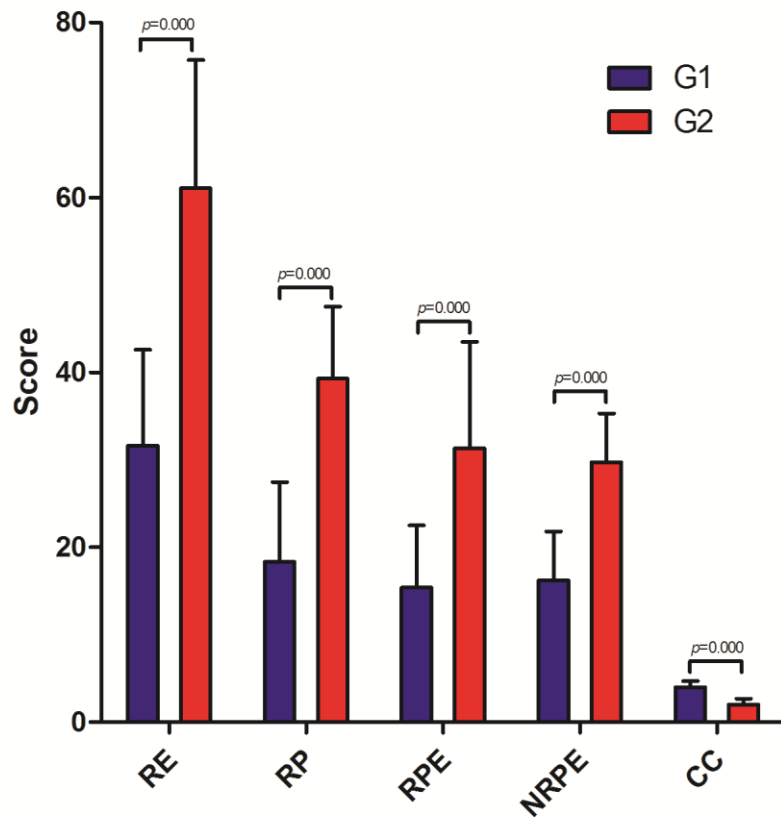

**Supplementary Figure 3.** Intergroup difference of WCST tests between G1 and G2. Significant differences of WCST scores of RE, RP, RPE, NRPE and CC was found between G1 and G2 ( $p=0.000$ ). CC, categories completed; G1, subgroup 1; G2, subgroup 2; RE, response errors; RP, perseverative responses; RPE, perseverative errors; NRPE, nonperseverative errors.
